# Supplementary material for: Comparative Effects of Particle Sizes of Cobalt Nanoparticles to Nine Biological Activities
Source: PubMed Central journal article supplement (PMC7555351; doi:10.3390/ijms21186767), 2020-09-15
Supplement: ijms-21-06767-s001.pdf [file ijms-21-06767-s001.pdf]

## Supplementary Materials

**Table 1.** Comparisons of the toxicity values of the different sizes of Co-NPs: (A) toxicity on the revertant mutation, (B) average toxicity for two endpoints of algal growth.

| (A)                     |              |           | (B)                     |                      |           |
|-------------------------|--------------|-----------|-------------------------|----------------------|-----------|
| Experimental conditions | Toxicity (%) |           | Experimental conditions | Average toxicity (%) |           |
|                         | 100 mg/L     | 500 mg/L  |                         | 1000 mg/L            | 2000mg/L  |
| type A                  | 35 ± 12.7    | 25 ± 1.9  | type A                  | 85 ± 8.5             | 89 ± 3.7  |
| type B                  | -20 ± 4.1    | -29 ± 7.1 | type B                  | 40 ± 9.7             | 77 ± 15.3 |

**Table 2.** Summary of two doses tested for each bioassay.

| # | Experiment                                          | Co-NP (mg/L) | # | Experiment                                     | Co-NP (mg/L) |
|---|-----------------------------------------------------|--------------|---|------------------------------------------------|--------------|
| 1 | Bioluminescence assay                               | 100, 200     | 4 | Gene mutation assay                            | 100, 500     |
| 2 | Bioreporter strain activity assay                   | 5, 10        | 5 | Algal growth assay                             | 1000, 2000   |
| 3 | Activity and biosynthesis of $\beta$ -galactosidase | 200, 600     | 6 | Seed germination, root, and shoot growth assay | 1000, 2000   |
